# Supplementary material for: Effect of tranexamic acid on intracranial haemorrhage and infarction in patients with traumatic brain injury: a pre-planned substudy in a sample of CRASH-3 trial patients
Source: HighWire-hosted journal article supplement (doi:10.1136/emermed-2020-210424), 2020-12-01
Supplement: emermed-2020-210424supp004_data_supplement.pdf [file emermed-2020-210424supp004_data_supplement.pdf]

**Appendix 4.** Outcomes in patients randomised within/after three hours of injury.**Intracranial haemorrhage**

There is no evidence that TXA prevents IPH expansion in patients randomised within 3 hours of injury (1.09, 95% CI (0.81–1.45),  $p=0.570$ ) or after three hours of injury (0.95, 95% CI (0.63–1.43),  $p=0.789$ ). There is no evidence that TXA prevents haemorrhage expansion in patients who had neurosurgical haemorrhage evacuation and were randomised within 3 hours of injury ( $n=277$ ) (0.94, 95% CI (0.62–1.42),  $p=0.756$ ) but there is some evidence in those randomised after three hours of injury ( $n=86$ ) (0.37, 95% CI (0.19–0.72),  $p=0.003$ ).

**Cerebral infarction**

There is no evidence for an increase in infarction with TXA at any particular time post-randomisation in those randomised within 3 hours of injury (adjusted HR=1.21, 95% CI (0.85–1.73),  $p=0.297$ ) or after 3 hours of injury (adjusted HR=1.68, 95% CI (0.78–3.59),  $p=0.185$ ).
